# Supplementary material for: Unmixing biological fluorescence image data with sparse and low-rank Poisson regression
Source: PubMed Central journal article supplement (PMC10081874; doi:10.1093/bioinformatics/btad159), 2023-03-25
Supplement: btad159_supplementary_data.pdf [file btad159_supplementary_data.pdf]

# Unmixing Biological Fluorescence Image Data with Sparse and Low-Rank Poisson Regression: Supplementary Material

Ruogu Wang, Alex A. Lemus, Colin M. Henneberry, Yiming Ying,  
Yunlong Feng, and Alex M. Valm

---

## Contents

|   |                                                                                       |      |
|---|---------------------------------------------------------------------------------------|------|
| 1 | The Proposed Algorithms for Solving PNMF and SL-PRU                                   | i    |
| 2 | Supplementary Table 1: Salient Characteristics of FISH Probes                         | vi   |
| 3 | Supplementary Figure 1: Emission Spectra of Endmembers and the Extracted Endmembers   | vii  |
| 4 | Supplementary Table 2: Descriptions of Fluorophores                                   | viii |
| 5 | Supplementary Figure 2: Quantitative Line Scan Analysis on Dental Plaque Smear Images | ix   |
| 6 | Supplementary Movie: SL-RPU Unmixed Dental Plaque Smear                               | x    |
|   | References                                                                            | xi   |

---

## 1 The Proposed Algorithms for Solving PNMF and SL-PRU

We first present the developed algorithms for solving the endmember extraction problem through PNMF and for solving the abundance estimation problem through SL-PRU, respectively. To this end, we first recall that the endmember  $\mathbf{m} \in \mathbb{R}_+^C$  extracted from a reference image  $\mathbf{Y}_m \in \mathbb{R}_+^{C \times N}$  and the corresponding abundances  $\mathbf{a} \in \mathbb{R}_+^N$  are obtained through Poisson Nonnegative Matrix Factorization (PNMF):

$$\min_{\mathbf{m} \in \mathbb{R}_+^C, \mathbf{a} \in \mathbb{R}_+^N} \mathbf{1}_C^\top [\mathbf{m}\mathbf{a}^\top - \mathbf{Y}_m \circ \log(\mathbf{m}\mathbf{a}^\top)] \mathbf{1}_N, \quad (1)$$

where  $\mathbf{1}_C$  and  $\mathbf{1}_N$  are vectors of length  $C$  and  $N$  whose entries are all 1 and  $\circ$  denotes element-wise multiplication. PNMF (1) can be solved by *multiplicative update algorithm* (Lee and Seung, 2000) which is a diagonally rescaled version of gradient descent. Denoting any variable  $\mathbf{X}$  at the  $t$ -th iteration as  $\mathbf{X}^{(t)}$  and the maximum norm as  $\|\cdot\|_\infty$ , the pseudocode of the multiplicative update algorithm is provided in Algorithm 1. The abundance vector  $\mathbf{a}$  and the endmember vector  $\mathbf{m}$  are initialized with random values that follow the standard uniform distribution  $U(0, 1)$ . At each iteration, the endmember vector is standardized by dividing by its maximum for uniqueness. The

algorithm stops when the relative change of the standardized endmember  $\tilde{\mathbf{m}}$  between the  $(t-1)$ -th and the  $t$ -th iterations given by

$$\frac{\|\tilde{\mathbf{m}}^{(t)} - \tilde{\mathbf{m}}^{(t-1)}\|_2^2}{\|\tilde{\mathbf{m}}^{(t-1)}\|_2^2}$$

is less than a small threshold value.

**Input:** A reference image  $\mathbf{Y}_m \in \mathbb{R}_+^{C \times N}$ ;

**Output:** The standardized endmember vector  $\tilde{\mathbf{m}}$ ;

**Initialization:**  $\mathbf{a}^{(0)}, \mathbf{m}^{(0)}$ ;

**repeat**

$$\left\{ \begin{array}{l} a_n^{(t)} \leftarrow \tilde{a}_n^{(t-1)} \cdot \left( \frac{\sum_c y_{cn} \tilde{m}_c^{(t-1)}}{\tilde{m}_c^{(t-1)} \tilde{a}_n^{(t-1)}} \right) / \left( \sum_c \tilde{m}_c^{(t-1)} \right); \\ m_c^{(t)} \leftarrow \tilde{m}_c^{(t-1)} \cdot \left( \frac{\sum_n y_{cn} a_n^{(t)}}{\tilde{m}_c^{(t-1)} a_n^{(t)}} \right) / \left( \sum_n a_n^{(t)} \right); \\ \tilde{m}_c^{(t)} \leftarrow m_c^{(t)} / \|\mathbf{m}^{(t)}\|_\infty; \\ \tilde{a}_n^{(t)} \leftarrow a_n^{(t)} \cdot \|\mathbf{m}^{(t)}\|_\infty; \end{array} \right.$$

**until** the stopping criterion is satisfied;

**Algorithm 1:** Multiplicative update algorithm for PNMf (1)

We are now in a position to detail the proposed algorithm for solving the proposed regularized sparse and low-rank Poisson regression unmixing approach (SL-PRU) that reads

$$\min_{\mathbf{A} \in \mathbb{R}_+^{R \times N}} \mathbf{1}_C^\top [\mathbf{MA} - \mathbf{Y} \circ \log(\mathbf{MA})] \mathbf{1}_N + \lambda_1 \|\mathbf{A}\|_{\mathbf{w}_p, * } + \lambda_2 \|\mathbf{W}_q \mathbf{A}\|_{2,1}. \quad (2)$$

Inspired by the work in Giampouras *et al.* (2016), an alternating direction method of multipliers (ADMM) technique (Boyd *et al.*, 2011) is adopted in our study by first letting all elements of  $\mathbf{w}_p$  be equal to ensure the convexity of the low-rankness regularization term in SL-PRU (2). Similar to the work in Giampouras *et al.* (2016), we introduce auxiliary variables  $\mathbf{V}_1 \in \mathbb{R}^{C \times N}$ ,  $\mathbf{V}_2, \mathbf{V}_3, \mathbf{V}_4 \in \mathbb{R}^{R \times N}$  and reformulate SL-PRU (2) as follows

$$\begin{aligned} \min_{\mathbf{U}, \mathbf{V}_1, \mathbf{V}_2, \mathbf{V}_3, \mathbf{V}_4} \quad & \mathbf{1}_C^\top [\mathbf{V}_1 - \mathbf{Y} \circ \log(\mathbf{V}_1)] \mathbf{1}_N + \lambda_1 \|\mathbf{V}_2\|_{\mathbf{w}_p, * } + \lambda_2 \|\mathbf{W}_q \mathbf{V}_3\|_{2,1} + \mathcal{I}_{\mathbb{R}_+}(\mathbf{V}_4), \\ \text{s.t.} \quad & \mathbf{V}_1 = \mathbf{MU}, \mathbf{V}_2 = \mathbf{U}, \mathbf{V}_3 = \mathbf{U}, \mathbf{V}_4 = \mathbf{U}, \end{aligned} \quad (3)$$

where  $\mathcal{I}_{\mathbb{R}_+}(\cdot)$  is the indicator function which is zero if all the entries are nonnegative and infinity otherwise. The augmented Lagrangian function for the constrained optimization problem (3) is given as follows:

$$\begin{aligned} & \mathcal{L}_1(\mathbf{U}, \mathbf{V}_1, \mathbf{V}_2, \mathbf{V}_3, \mathbf{V}_4, \mathbf{D}_1, \mathbf{D}_2, \mathbf{D}_3, \mathbf{D}_4) \\ &= \mathbf{1}_C^\top [\mathbf{V}_1 - \mathbf{Y} \circ \log(\mathbf{V}_1)] \mathbf{1}_N + \lambda_1 \|\mathbf{V}_2\|_{\mathbf{w}_p, * } + \lambda_2 \|\mathbf{W}_q \mathbf{V}_3\|_{2,1} + \mathcal{I}_{\mathbb{R}_+}(\mathbf{V}_4) \\ & \quad + \text{tr}(\mathbf{D}_1^\top (\mathbf{V}_1 - \mathbf{MU})) + \text{tr}(\mathbf{D}_2^\top (\mathbf{V}_2 - \mathbf{U})) + \text{tr}(\mathbf{D}_3^\top (\mathbf{V}_3 - \mathbf{U})) + \text{tr}(\mathbf{D}_4^\top (\mathbf{V}_4 - \mathbf{U})) \\ & \quad + \frac{\mu}{2} (\|\mathbf{MU} - \mathbf{V}_1\|_F^2 + \|\mathbf{U} - \mathbf{V}_2\|_F^2 + \|\mathbf{U} - \mathbf{V}_3\|_F^2 + \|\mathbf{U} - \mathbf{V}_4\|_F^2), \end{aligned} \quad (4)$$

where  $\mathbf{D}_1 \in \mathbb{R}^{C \times N}$ ,  $\mathbf{D}_2, \mathbf{D}_3, \mathbf{D}_4 \in \mathbb{R}^{R \times N}$  denote the Lagrange multipliers,  $\text{tr}(\cdot)$  denotes matrix trace,  $\mu > 0$  is a Lagrange multiplier regularization parameter, and  $\|\cdot\|_F$  denotes the Frobenius norm.

Denoting the identity matrix of size  $k \times k$  as  $\mathbf{I}_k$  and the scaled Lagrange multipliers as  $\mathbf{D}'_i = \mathbf{D}_i/\mu, i = 1, 2, 3, 4$ , the augmented Lagrangian function  $\mathcal{L}_1$  can be rewritten as

$$\begin{aligned} \mathcal{L}_2(\mathbf{U}, \mathbf{V}, \mathbf{D}) &= \mathbf{1}_C^\top [\mathbf{V}_1 - \mathbf{Y} \circ \log(\mathbf{V}_1)] \mathbf{1}_N + \lambda_1 \|\mathbf{V}_2\|_{\mathbf{w}_p, *} + \lambda_2 \|\mathbf{W}_q \mathbf{V}_3\|_{2,1} + \mathcal{I}_{\mathbb{R}_+}(\mathbf{V}_4) \\ &\quad + \frac{\mu}{2} \|\mathbf{G}\mathbf{U} + \mathbf{B}\mathbf{V} - \mathbf{D}\|_F^2, \end{aligned} \quad (5)$$

where

$$\mathbf{V} = \begin{bmatrix} \mathbf{V}_1 \\ \mathbf{V}_2 \\ \mathbf{V}_3 \\ \mathbf{V}_4 \end{bmatrix}, \mathbf{D} = \begin{bmatrix} \mathbf{D}'_1 \\ \mathbf{D}'_2 \\ \mathbf{D}'_3 \\ \mathbf{D}'_4 \end{bmatrix}, \mathbf{G} = \begin{bmatrix} \mathbf{M} \\ \mathbf{I}_R \\ \mathbf{I}_R \\ \mathbf{I}_R \end{bmatrix}, \mathbf{B} = -\mathbf{I}_{C+3R}.$$

The proposed ADMM-type algorithm for solving SL-PRU sequentially optimizes (4) or (5) with respect to each variable while the other variables remain as the latest values. Note that the augmented Lagrangian (5) is convex w.r.t.  $\mathbf{U}, \mathbf{V}_1, \mathbf{V}_2, \mathbf{V}_3$ , and  $\mathbf{V}_4$ , respectively, due to the assumption that all elements of  $\mathbf{w}_p$  are equal and the fact that all entries of  $\mathbf{W}_q$  are nonnegative. Therefore, at the  $t$ -th iteration, the updates of the abundance matrix  $\mathbf{U}$  and the auxiliary variables  $\mathbf{V}_1, \mathbf{V}_2, \mathbf{V}_3$ , and  $\mathbf{V}_4$  can be deduced, respectively, as follows:

**Updating  $\mathbf{U}$ :** The minimization of  $\mathcal{L}_2$  w.r.t.  $\mathbf{U}$  at the  $t$ -th iteration is equivalent to

$$\frac{\partial \frac{\mu}{2} \|\mathbf{G}\mathbf{U} + \mathbf{B}\mathbf{V}^{(t-1)} - \mathbf{D}\|_F^2}{\partial \mathbf{U}} = 0,$$

which yields

$$\mu \mathbf{G}^\top (\mathbf{G}\mathbf{U} + \mathbf{B}\mathbf{V} - \mathbf{D}) = \mu [(\mathbf{M}^\top \mathbf{M} + 3\mathbf{I}_R) \mathbf{U} - \mathbf{G}^\top (\mathbf{B}\mathbf{V} - \mathbf{D})] = 0.$$

As a result, we have

$$\begin{aligned} \mathbf{U}^{(t)} &= \arg \min_{\mathbf{U}} \mathcal{L}_2(\mathbf{U}, \mathbf{V}^{(t-1)}, \mathbf{D}^{(t-1)}) = (\mathbf{M}^\top \mathbf{M} + 3\mathbf{I}_R)^{-1} \\ &\quad \left[ \mathbf{M}^\top \left( \mathbf{V}_1^{(t-1)} + \mathbf{D}'_1^{(t-1)} \right) + \mathbf{V}_2^{(t-1)} + \mathbf{D}'_2^{(t-1)} + \mathbf{V}_3^{(t-1)} + \mathbf{D}'_3^{(t-1)} + \mathbf{V}_4^{(t-1)} + \mathbf{D}'_4^{(t-1)} \right]. \end{aligned}$$

**Updating  $\mathbf{V}_1$ :** Denoting the  $(c, n)$ -th entry of  $\mathbf{V}_1$  as  $v_{cn}$  with  $c = 1, \dots, C$  and  $n = 1, \dots, N$ , we have

$$\mathbf{1}_C^\top [\mathbf{V}_1 - \mathbf{Y} \circ \log(\mathbf{V}_1)] \mathbf{1}_N = \sum_{c,n} [v_{cn} - y_{cn} \log(v_{cn})].$$

Since

$$\left( \frac{\partial \mathbf{1}_C^\top [\mathbf{V}_1 - \mathbf{Y} \circ \log(\mathbf{V}_1)] \mathbf{1}_N}{\partial \mathbf{V}_1} \right)_{cn} = \frac{\partial [v_{cn} - y_{cn} \log(v_{cn})]}{\partial v_{cn}} = 1 - \frac{y_{cn}}{v_{cn}},$$

and

$$\left( \frac{\partial \frac{\mu}{2} \|\mathbf{M}\mathbf{U}^{(t)} - \mathbf{V}_1 - \mathbf{D}'_1\|_F^2}{\partial \mathbf{V}_1} \right)_{cn} = \mu [v_{cn} + (\mathbf{D}'_1^{(t-1)} - \mathbf{M}\mathbf{U}^{(t)})_{cn}],$$

we know that minimizing  $\mathcal{L}_2$  w.r.t.  $v_{cn}$  is equivalent to

$$v_{cn}^2 - (\mathbf{V}_1^{(t)})_{cn} \cdot v_{cn} - \frac{y_{cn}}{\mu} = 0,$$

where  $\mathbf{V}_1^{(t)} = \mathbf{M}\mathbf{U}^{(t)} - \mathbf{D}_1^{(t-1)} - 1/\mu$ . Solving the above quadratic equation w.r.t.  $v_{cn}$ , we have

$$\mathbf{V}_1^{(t)} = \arg \min_{\mathbf{V}_1} \mathcal{L}_2 \left( \mathbf{U}^{(t)}, \begin{bmatrix} \mathbf{V}_1 \\ \mathbf{V}_2^{(t-1)} \\ \mathbf{V}_3^{(t-1)} \\ \mathbf{V}_4^{(t-1)} \end{bmatrix}, \mathbf{D}^{(t-1)} \right) = \frac{\mathbf{V}_1^{(t)} + \sqrt{\mathbf{V}_1^{(t)} \circ \mathbf{V}_1^{(t)} + 4\mathbf{Y}/\mu}}{2},$$

where  $\sqrt{\cdot}$  denotes the element-wise square root.

**Updating  $\mathbf{V}_2$ :** Minimizing  $\mathcal{L}_2$  w.r.t.  $\mathbf{V}_2$  is equivalent to

$$\min_{\mathbf{V}_2} \lambda_1 \|\mathbf{V}_2\|_{\mathbf{w}_p, *} + \frac{\mu}{2} \|\mathbf{U} - \mathbf{V}_2 - \mathbf{D}_2'\|_F^2,$$

which can be solved by a soft-thresholding operation (Cai *et al.*, 2010) on the singular values of  $\mathbf{V}_2$ . Recall that the singular value decomposition of  $\mathbf{U}^{(t)} - \mathbf{D}_2^{(t-1)}$  is  $\mathbf{S}_l \mathbf{\Sigma}^{(t)} \mathbf{S}_r^\top$ , the soft-thresholding function on each diagonal element of  $\mathbf{\Sigma}^{(t)}$ , i.e.,  $\sigma_p^{(t)}$ , with parameter  $\lambda_1 \mathbf{w}_p / \mu$  is

$$\max\{\mathbf{0}, \sigma_p^{(t)} - \lambda_1 \mathbf{w}_p / \mu\},$$

for any  $p = 1, 2, \dots, \text{rank}(\mathbf{V}_2)$ . Thus, the optimization w.r.t.  $\mathbf{V}_2$  gives

$$\mathbf{V}_2^{(t)} = \arg \min_{\mathbf{V}_2} \mathcal{L}_2 \left( \mathbf{U}^{(t)}, \begin{bmatrix} \mathbf{V}_1^{(t)} \\ \mathbf{V}_2 \\ \mathbf{V}_3^{(t-1)} \\ \mathbf{V}_4^{(t-1)} \end{bmatrix}, \mathbf{D}^{(t-1)} \right) = \mathbf{S}_l [\text{sign}(\mathbf{\Sigma}^{(t)}) \circ \max\{\mathbf{0}, \mathbf{\Sigma}^{(t)} - \lambda_1 \text{diag}(\mathbf{w}_p) / \mu\}] \mathbf{S}_r^\top,$$

where  $\text{sign}(\cdot)$  is the element-wise sign function,  $\max\{\cdot, \cdot\}$  denotes the element-wise max function, and  $\text{diag}(\cdot)$  creates a matrix with diagonal elements equal to the vector elements.

**Updating  $\mathbf{V}_3$ :** Minimizing  $\mathcal{L}_2$  w.r.t.  $\mathbf{V}_3$  is equivalent to

$$\min_{\mathbf{V}_3} \lambda_2 \|\mathbf{W}_q \mathbf{V}_3\|_{2,1} + \frac{\mu}{2} \|\mathbf{U} - \mathbf{V}_3 - \mathbf{D}_3'\|_F^2,$$

which can be solved by a vectorial soft-thresholding operation (Wright *et al.*, 2009) on each row of  $\mathbf{V}_3^{(t)}$ . More specifically, denoting  $\mathbf{V}_{3,r}^{(t)}$  as the  $r$ -th row of  $\mathbf{V}_3^{(t)}$  and  $\mathbf{x}_r^{(t)}$  as the  $r$ -th row of  $\mathbf{U}^{(t)} - \mathbf{D}_3^{(t-1)}$  where  $r = 1, \dots, R$ , each row of  $\mathbf{V}_3$  is updated sequentially as

$$\mathbf{V}_{3,r}^{(t)} = \arg \min_{\mathbf{V}_{3,r}} \mathcal{L}_2 \left( \mathbf{U}^{(t)}, \begin{bmatrix} \mathbf{V}_1^{(t)} \\ \mathbf{V}_2^{(t)} \\ \mathbf{V}_{3,1}^{(t)} \\ \vdots \\ \mathbf{V}_{3,r-1}^{(t)} \\ \mathbf{V}_{3,r} \\ \mathbf{V}_{3,r+1}^{(t-1)} \\ \vdots \\ \mathbf{V}_{3,R}^{(t-1)} \\ \mathbf{V}_4^{(t-1)} \end{bmatrix}, \mathbf{D}^{(t-1)} \right) = \frac{\mathbf{x}_r^{(t)} \max\{\|\mathbf{x}_r^{(t)}\|_2 - \lambda_2 w_{q,r} / \mu, 0\}}{\max\{\|\mathbf{x}_r^{(t)}\|_2 - \lambda_2 w_{q,r} / \mu, 0\} + \lambda_2 w_{q,r} / \mu}.$$

**Input:** The data matrix  $\mathbf{Y} \in \mathbb{R}_+^{C \times N}$ , and the endmember matrix  $\mathbf{M} \in \mathbb{R}_+^{C \times R}$ ;

**Output:** The abundance matrix  $\mathbf{U}$ ;

**Initialization:**  $\mathbf{U}^0, \mathbf{V}_i^0, \mathbf{D}_i^0, \quad i = 1, 2, 3, 4$ ;

**repeat**

$$\left| \begin{array}{l} \mathbf{U}^{(t)} \leftarrow (\mathbf{M}^\top \mathbf{M} + 3\mathbf{I}_R)^{-1} \left[ \mathbf{M}^\top \left( \mathbf{V}_1^{(t-1)} + \mathbf{D}_1'^{(t-1)} \right) + \mathbf{V}_2^{(t-1)} + \mathbf{D}_2'^{(t-1)} + \mathbf{V}_3^{(t-1)} + \right. \\ \quad \left. \mathbf{D}_3'^{(t-1)} + \mathbf{V}_4^{(t-1)} + \mathbf{D}_4'^{(t-1)} \right]; \\ \mathbf{V}_1^{(t)} \leftarrow \left( \mathbf{V}_1^{(t)} + \sqrt{\mathbf{V}_1^{(t)} \circ \mathbf{V}_1^{(t)} + 4\mathbf{Y}/\mu} \right) / 2; \\ \mathbf{V}_2^{(t)} \leftarrow \mathbf{S}_l[\text{sign}(\boldsymbol{\Sigma}) \circ \max\{\mathbf{0}, \boldsymbol{\Sigma} - \lambda_1 \text{diag}(\mathbf{w}_p)/\mu\}] \mathbf{S}_r^\top; \\ \mathbf{V}_{3,r}^{(t)} \leftarrow (\mathbf{x}_r^{(t)} \max\{\|\mathbf{x}_r^{(t)}\|_2 - \lambda_2 w_{q,r}/\mu, 0\}) / (\max\{\|\mathbf{x}_r^{(t)}\|_2 - \lambda_2 w_{q,r}/\mu, 0\} + \lambda_2 w_{q,r}/\mu), \quad r = \\ \quad 1, \dots, R; \\ \mathbf{V}_4^{(t)} \leftarrow \max\{\mathbf{U}^{(t)} - \mathbf{D}_4'^{(t-1)}, \mathbf{0}\}; \\ \mathbf{D}_1'^{(t)} \leftarrow \mathbf{D}_1'^{(t-1)} - \mathbf{M}\mathbf{U}^{(t)} + \mathbf{V}_1^{(t)}; \\ \mathbf{D}_i'^{(t)} \leftarrow \mathbf{D}_i'^{(t-1)} - \mathbf{U}^{(t)} + \mathbf{V}_i^{(t)}, \quad i = 2, 3, 4; \end{array} \right.$$

**until** the stopping criteria are satisfied;

**Algorithm 2:** The proposed ADMM-type algorithm for SL-PRU (2)

**Updating  $\mathbf{V}_4$ :** Minimizing  $\mathcal{L}_2$  w.r.t.  $\mathbf{V}_4$  is equivalent to

$$\min_{\mathbf{V}_4} \mathcal{I}_{\mathbb{R}_+}(\mathbf{V}_4) + \frac{\mu}{2} \|\mathbf{U} - \mathbf{V}_4 - \mathbf{D}_4'\|_F^2,$$

where the first term is to project  $\mathbf{V}_4$  onto the nonnegative orthant. Thus, the optimization w.r.t.  $\mathbf{V}_4$  gives

$$\mathbf{V}_4^{(t)} = \arg \min_{\mathbf{V}_4} \mathcal{L}_2 \left( \mathbf{U}^{(t)}, \begin{bmatrix} \mathbf{V}_1^{(t)} \\ \mathbf{V}_2^{(t)} \\ \mathbf{V}_3^{(t)} \\ \mathbf{V}_4 \end{bmatrix}, \mathbf{D}^{(t-1)} \right) = \max\{\mathbf{U}^{(t)} - \mathbf{D}_4'^{(t-1)}, \mathbf{0}\}.$$

**Updating  $\mathbf{D}_1'$ ,  $\mathbf{D}_2'$ ,  $\mathbf{D}_3'$ , and  $\mathbf{D}_4'$ :** These scaled Lagrange multipliers are updated as follows

$$\mathbf{D}_1'^{(t)} = \mathbf{D}_1'^{(t-1)} - \mathbf{M}\mathbf{U}^{(t)} + \mathbf{V}_1^{(t)}, \quad \mathbf{D}_i'^{(t)} = \mathbf{D}_i'^{(t-1)} - \mathbf{U}^{(t)} + \mathbf{V}_i^{(t)}, \quad i = 2, 3, 4.$$

The stopping criteria adopted in the algorithm are based on the primal and dual residuals (Boyd *et al.*, 2011)  $\mathbf{r}_p$  and  $\mathbf{r}_d$  given by

$$\mathbf{r}_p = \mathbf{G}\mathbf{U}^{(t)} + \mathbf{B}\mathbf{V}^{(t)}, \quad \mathbf{r}_d = \mu \mathbf{G}^\top \mathbf{B} \left( \mathbf{V}^{(t)} - \mathbf{V}^{(t-1)} \right),$$

that go to 0, respectively, as  $t \rightarrow \infty$ . The algorithm terminates whenever any of the  $\ell_2$  norms of  $\mathbf{r}_p$  or  $\mathbf{r}_d$  is less than a small threshold value or some number of iterations is reached. To enhance the performance of the algorithm, as done in Giampouras *et al.* (2016), we also update the weights  $\mathbf{w}_p$  and  $\mathbf{W}_q$  based on  $\mathbf{U}^{(t)}$  at the  $t$ -th iteration as follows

$$w_{p,i}^{(t)} = \frac{1}{\sigma_i(\mathbf{U}^{(t)}) + \varepsilon}, \quad w_{q,r} = \frac{1}{\|\mathbf{u}_r^{(t)}\|_2 + \varepsilon},$$

where  $\mathbf{u}_r^{(t)}$  denotes the  $r$ -th row of  $\mathbf{U}^{(t)}$  and  $\varepsilon > 0$  is assigned a small value to avoid singularities.

The pseudo-code of the proposed algorithm for solving SL-PRU is presented in Algorithm 2.

## 2 Supplementary Table 1: Salient Characteristics of FISH Probes

| Probe name | Target          | Sequence            | Fluorophore in plaque smear image    | Reference                              |
|------------|-----------------|---------------------|--------------------------------------|----------------------------------------|
| ACT-476    | Actinomyces     | ATCCAGCTACCGTCAACC  | Alexafluor 488                       | (Gmür and Lüthi-Schaller, 2007)        |
| STR-405    | Streptococcus   | TAGCCGTCCCTTTCTGGT  | Alexafluor 594                       | (Paster, Bruce J <i>et al.</i> , 1998) |
| FUS-714    | Fusobacterium   | GGCTTCCCCCATCGGCATT | Alexafluor 555                       | (Valm, Alex M <i>et al.</i> , 2011)    |
| LEP-568    | Leptotrichia    | GCCTAGATGCCCTTTATG  | Alexafluor 660                       | (Valm, Alex M <i>et al.</i> , 2011)    |
| NEI-1030   | Neisseriaceae   | CCTGTGTTACGGCTCCCG  | Tetrachlorofluorescein               | (Valm, Alex M <i>et al.</i> , 2011)    |
| PGI-350    | Porphyromonas   | CCTCACGCCTTACGACGG  | Alexafluor 647                       | (Valm, Alex M <i>et al.</i> , 2011)    |
| VEI-488    | Veillonella     | CCGTGGCTTTCTATTCCG  | Alexafluor 514                       | (Chalmers <i>et al.</i> , 2008)        |
| PRV-392    | Prevotella      | GCACGCTACTTGGCTGG   | Alexafluor 633                       | (Diaz <i>et al.</i> , 2006)            |
| PAS-111    | Pasteurellaceae | TCCCAAGCATTACTCACC  | Rhodamine Red-X                      | (Valm, Alex M <i>et al.</i> , 2011)    |
| EUB-338    | All bacteria    | GCTGCCCTCCCGTAGGAGT | Used for E. coli reference standards | (Amann <i>et al.</i> , 1990)           |

### 3 Supplementary Figure 1: Emission Spectra of Endmembers and the Extracted Endmembers

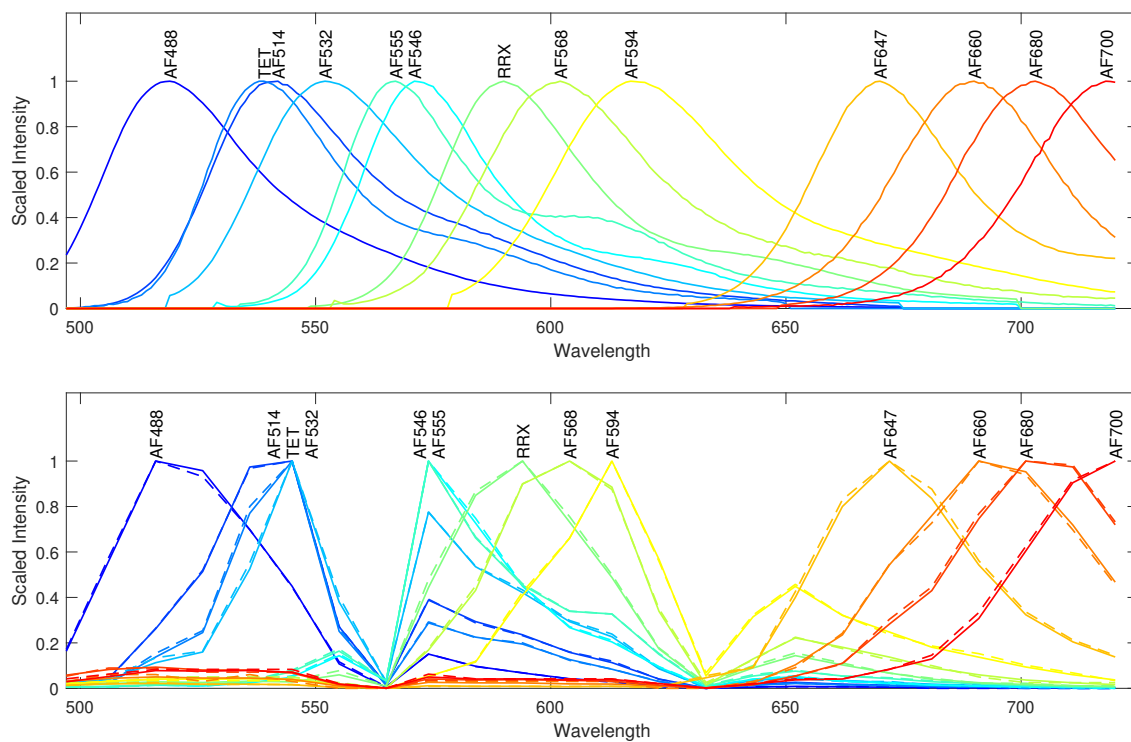

Supplementary Figure 1: Empirically measured spectra of thirteen endmembers from Supplementary Table 2 above. Top row: Fluorometer data provided by the manufacturers of the dyes sampled in 1 nm wavelength bands. Bottom row: Endmembers extracted by arithmetic mean (dashed curves) method and PNMf (solid curves) from real images of labeled *E. coli* acquired on a spectral confocal microscope with 9.8 nm wavelength bands.

---

## 4 Supplementary Table 2: Descriptions of Fluorophores

| Fluorophore            | Abbreviation | Peak Excitation $\lambda$ (nm) | Peak Emission $\lambda$ (nm) |
|------------------------|--------------|--------------------------------|------------------------------|
| Alexafluor 488         | AF488        | 495                            | 519                          |
| Alexafluor 514         | AF514        | 517                            | 542                          |
| Tetrachlorofluorescein | TET          | 522                            | 539                          |
| Alexafluor 532         | AF532        | 532                            | 553                          |
| Alexafluor 546         | AF546        | 556                            | 573                          |
| Alexafluor 555         | AF555        | 555                            | 565                          |
| Rhodamine Red-X        | RRX          | 560                            | 580                          |
| Alexafluor 568         | AF568        | 578                            | 603                          |
| Alexafluor 633         | AF633        | 621                            | 639                          |
| Alexafluor 647         | AF647        | 650                            | 665                          |
| Alexafluor 660         | AF660        | 663                            | 690                          |
| Alexafluor 680         | AF680        | 679                            | 702                          |
| Alexafluor 700         | AF700        | 702                            | 723                          |

Supplementary Table 2: Names, abbreviations, and peak excitation and emission wavelengths for all fluorophores used in this study.



## 5 Supplementary Figure 2: Quantitative Line Scan Analysis on Dental Plaque Smear Images

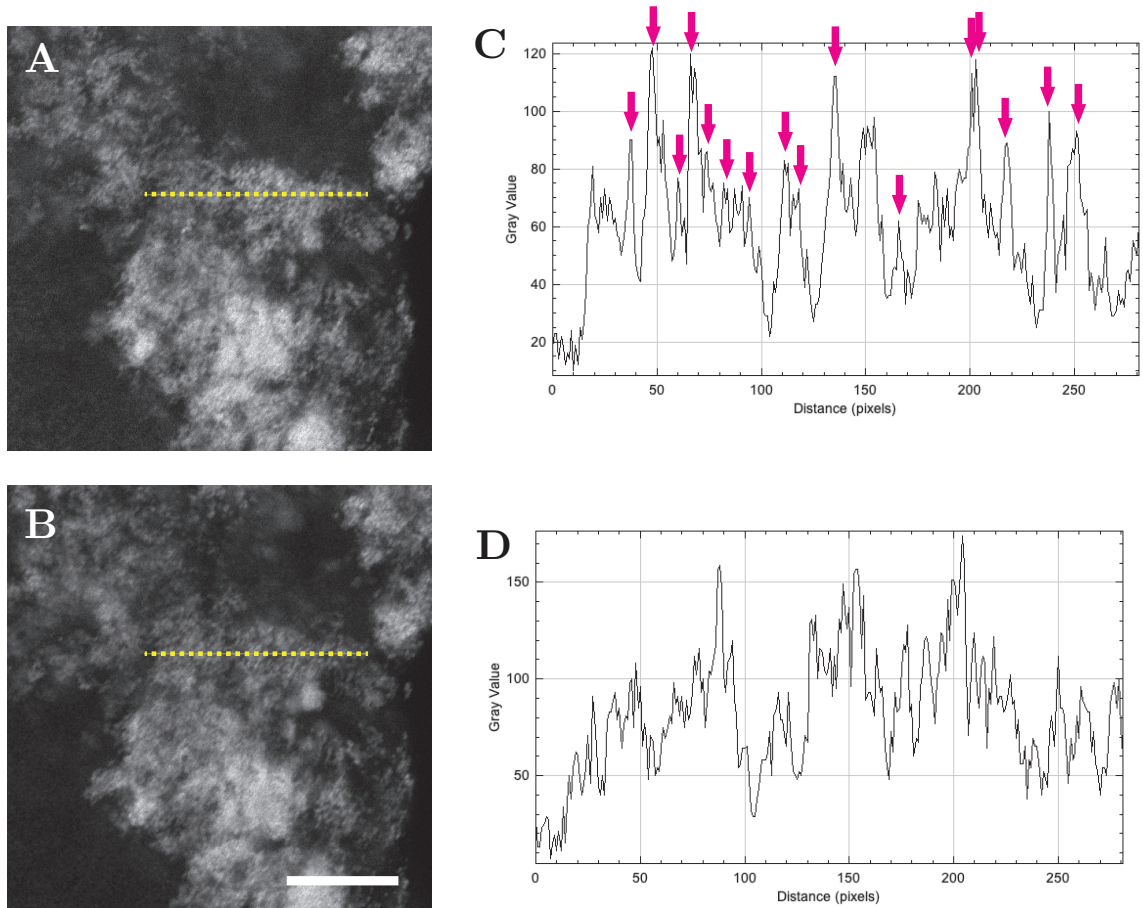

Supplementary Figure 2: A-B. Region of interest images from the Streptococcus (Alexa-fluor 594) channel from (A) SL-PRU unmixed image and (B) commercial least squares unmixed image. Yellow dotted lines show where line scan analysis was performed in each image. Bar = 25  $\mu\text{m}$ . C-D: Line scan analysis results (intensity vs. pixel position) for SL-PRU unmixed (C) and least squares unmixed (D) along the length of the lines in A & B. Magenta arrows in (C) identify peaks with a full-width-at-half-maximum of approximately 4-5 pixels (0.7-0.9  $\mu\text{m}$ ), the known diameter of oral Streptococcus cells (Baron, Samuel and Patterson, Maria Jevitz, 1996).

## **6 Supplementary Movie: SL-RPU Unmixed Dental Plaque Smear**

3-D volume-rendered movie of a dental plaque smear labeled with 8 taxon-specific FISH probes (See Figure 6 in Main Text for color legend). Spectral image was unmixed with SL-RPU.

---

## References

- Amann, R. I. *et al.* (1990). Combination of 16s rRNA-targeted oligonucleotide probes with flow cytometry for analyzing mixed microbial populations. *Applied and Environmental Microbiology*, **56**(6), 1919–1925.
- Baron, Samuel and Patterson, Maria Jevitz (1996). Streptococcus. *Clinical Microbiology Reviews*, **2**(3), 315.
- Boyd, S. *et al.* (2011). Distributed optimization and statistical learning via the alternating direction method of multipliers. *Foundations and Trends® in Machine Learning*, **3**(1), 1–122.
- Cai, J.-F. *et al.* (2010). A singular value thresholding algorithm for matrix completion. *SIAM Journal on Optimization*, **20**(4), 1956–1982.
- Chalmers, N. I. *et al.* (2008). Characterization of a Streptococcus sp.-Veillonella sp. community micromanipulated from dental plaque. *Journal of Bacteriology*, **190**(24), 8145–8154.
- Diaz, P. I. *et al.* (2006). Molecular characterization of subject-specific oral microflora during initial colonization of enamel. *Applied and Environmental Microbiology*, **72**(4), 2837–2848.
- Giampouras, P. V. *et al.* (2016). Simultaneously sparse and low-rank abundance matrix estimation for hyperspectral image unmixing. *IEEE Transactions on Geoscience and Remote Sensing*, **54**(8), 4775–4789.
- Gmür, R. and Lüthi-Schaller, H. (2007). A combined immunofluorescence and fluorescent in situ hybridization assay for single cell analyses of dental plaque microorganisms. *Journal of Microbiological Methods*, **69**(2), 402–405.
- Lee, D. and Seung, H. S. (2000). Algorithms for non-negative matrix factorization. *Advances in Neural Information processing Systems*, **13**.
- Paster, Bruce J *et al.* (1998). Identification of oral streptococci using PCR-based, reverse-capture, checkerboard hybridization. *Methods in Cell Science*, **20**(1), 223–231.
- Valm, Alex M *et al.* (2011). Systems-level analysis of microbial community organization through combinatorial labeling and spectral imaging. *Proceedings of the National Academy of Sciences of the United States of America*, **108**(10), 4152–4157.
- Wright, S. J. *et al.* (2009). Sparse reconstruction by separable approximation. *IEEE Transactions on Signal Processing*, **57**(7), 2479–2493.
